# Supplementary material for: Diagnosis and mortality in prehospital emergency patients transported to hospital: a population-based and registry-based cohort study
Source: PubMed Central journal article supplement — BMJ Open. 2016 Jul 4;6(7):e011558. doi: 10.1136/bmjopen-2016-011558 (PMC4947831; doi:10.1136/bmjopen-2016-011558), 2016-07-04
Supplement: bmjopen-2016-011558supp_appendix.pdf [file bmjopen-2016-011558supp_appendix.pdf]

Appendix 1.

| Main chapters of ICD-10 related to survival<br>Age 0 -10 |                                                                                                     | Day 1 mortality      | Number<br>of deaths | Day 30 mortality     | Number of<br>deaths |
|----------------------------------------------------------|-----------------------------------------------------------------------------------------------------|----------------------|---------------------|----------------------|---------------------|
|                                                          |                                                                                                     | % (CI)               | Day one             | % (CI)               | Day 30              |
| I.                                                       | Certain infectious and parasitic diseases                                                           | 0.0                  | 0                   | 0.9 (0.1-6.4)        | 1                   |
| II.                                                      | Neoplasms                                                                                           | 0.0                  | 0                   | 0.0                  | 0                   |
| III.                                                     | Diseases of the blood and blood-forming organs and certain disorders involving the immune mechanism | 0.0                  | 0                   | 0.0                  | 0                   |
| IV.                                                      | Endocrine, nutritional and metabolic diseases                                                       | 0.0                  | 0                   | 0.0                  | 0                   |
| V.                                                       | Mental and behavioural disorders                                                                    | 0.0                  | 0                   | 0.0                  | 0                   |
| VI.                                                      | Diseases of the nervous system                                                                      | 0.0                  | 0                   | 0.9 (0.3-2.7)        | 3                   |
| VII.                                                     | Diseases of the eye and adnexa                                                                      | 0.0                  | 0                   | 0.0                  | 0                   |
| VIII.                                                    | Diseases of the ear and mastoid process                                                             | 0.0                  | 0                   | 0.0                  | 0                   |
| IX.                                                      | Diseases of the circulatory system                                                                  | 13.3 (3.5-43.6)      | 2                   | 26.7 (10.9-56.4)     | 4                   |
| X.                                                       | Diseases of the respiratory system                                                                  | 0.5 (0.1-2.1)        | 2                   | 0.5 (0.1-2.1)        | 2                   |
| XI.                                                      | Diseases of the digestive system                                                                    | 0.0                  | 0                   | 0.0                  | 0                   |
| XII.                                                     | Diseases of the skin and subcutaneous tissue                                                        | 0.0                  | 0                   | 0.0                  | 0                   |
| XIII.                                                    | Diseases of the musculoskeletal system and connective tissue                                        | 0.0                  | 0                   | 0.0                  | 0                   |
| XIV.                                                     | Diseases of the genitourinary system                                                                | 0.0                  | 0                   | 0.0                  | 0                   |
| XV.                                                      | Pregnancy, childbirth and the puerperium                                                            | NA                   |                     | NA                   |                     |
| XVI.                                                     | Certain conditions originating in the perinatal period                                              | 0.0                  | 0                   | 0.0                  | 0                   |
| XVII.                                                    | Congenital malformations, deformations and chromosomal abnormalities                                | 7.1 (1.0-40.9)       | 1                   | 7.1 (1.0-40.9)       | 1                   |
| XVIII.                                                   | Symptoms, signs and abnormal clinical and laboratory findings, not elsewhere classified             | 0.0                  | 0                   | 0.0                  | 0                   |
| XIX.                                                     | Injury, poisoning and certain other consequences of external causes                                 | 0.1 (0.0-0.4)        | 1                   | 0.1 (0.0-0.5)        | 2                   |
| XXI.                                                     | Factors influencing health status and contact with health services                                  | 0.1 (0.0- 0.9)       | 1                   | 0.1 (0.0-0.9)        | 1                   |
|                                                          | Codes for special purposes                                                                          | -                    |                     | -                    |                     |
|                                                          | <b>Total</b>                                                                                        | <b>0.1 (0.1-0.3)</b> | <b>7</b>            | <b>0.2 (0.1-0.4)</b> | <b>14</b>           |

| Main chapters of ICD-10 related to survival<br>Age 11 -30 |                                                                                                     | Day 1 mortality |                  | Number<br>of deaths | Day 30 mortality |                  | Number of<br>deaths |
|-----------------------------------------------------------|-----------------------------------------------------------------------------------------------------|-----------------|------------------|---------------------|------------------|------------------|---------------------|
|                                                           |                                                                                                     | % (CI)          |                  | Day one             | % (CI)           |                  | Day 30              |
| I.                                                        | Certain infectious and parasitic diseases                                                           | 0.4             | (0.1-3.1)        | 1                   | 0.4              | (0.1-3.1)        | 1                   |
| II.                                                       | Neoplasms                                                                                           | 18.8            | (6.5-47.5)       | 3                   | 25.0             | (10.2-53.7)      | 4                   |
| III.                                                      | Diseases of the blood and blood-forming organs and certain disorders involving the immune mechanism | 0.0             |                  | 0                   | 0.0              |                  | 0                   |
| IV.                                                       | Endocrine, nutritional and metabolic diseases                                                       | 0.0             |                  | 0                   | 0.3              | (0.0-1.9)        | 1                   |
| V.                                                        | Mental and behavioural disorders                                                                    | 0.0             |                  | 0                   | 0.0              |                  | 0                   |
| VI.                                                       | Diseases of the nervous system                                                                      | 0.4             | (0.2-1.1)        | 4                   | 0.9              | (0.4-1.7)        | 8                   |
| VII.                                                      | Diseases of the eye and adnexa                                                                      | 0.0             |                  | 0                   | 0.0              |                  | 0                   |
| VIII.                                                     | Diseases of the ear and mastoid process                                                             | 0.0             |                  | 0                   | 0.0              |                  | 0                   |
| IX.                                                       | Diseases of the circulatory system                                                                  | 9.3             | (5.9-14.3)       | 18                  | 12.4             | (8.5-17.9)       | 24                  |
| X.                                                        | Diseases of the respiratory system                                                                  | 0.8             | (0.3-2.2)        | 4                   | 1.3              | (0.6-2.8)        | 6                   |
| XI.                                                       | Diseases of the digestive system                                                                    | 0.2             | (0.0-1.6)        | 1                   | 0.2              | (0.0-1.6)        | 1                   |
| XII.                                                      | Diseases of the skin and subcutaneous tissue                                                        | 0.0             |                  | 0                   | 0.0              |                  | 0                   |
| XIII.                                                     | Diseases of the musculoskeletal system and connective tissue                                        | 0.0             |                  | 0                   | 0.0              |                  | 0                   |
| XIV.                                                      | Diseases of the genitourinary system                                                                | 0.0             |                  | 0                   | 0.0              |                  | 0                   |
| XV.                                                       | Pregnancy, childbirth and the puerperium                                                            | 0.0             |                  | 0                   | 0.0              |                  | 0                   |
| XVI.                                                      | Certain conditions originating in the perinatal period                                              | 0.0             |                  | 0                   | 0.0              |                  | 0                   |
| XVII.                                                     | Congenital malformations, deformations and chromosomal abnormalities                                | 0.0             |                  | 0                   | 0.0              |                  | 0                   |
| XVIII.                                                    | Symptoms, signs and abnormal clinical and laboratory findings, not elsewhere classified             | 0.5             | (0.3-0.7)        | 21                  | 0.6              | (0.4-0.9)        | 27                  |
| XIX.                                                      | Injury, poisoning and certain other consequences of external causes                                 | 0.1             | (0.0-0.1)        | 11                  | 0.1              | (0.1-0.2)        | 20                  |
| XXI.                                                      | Factors influencing health status and contact with health services                                  | 0.1             | (0.0-0.2)        | 5                   | 0.2              | (0.1-0.3)        | 8                   |
|                                                           | Codes for special purposes                                                                          | 0.0             |                  | 0                   | 0.0              |                  | 0                   |
|                                                           | <b>Total</b>                                                                                        | <b>0.2</b>      | <b>(0.2-0.3)</b> | <b>68</b>           | <b>0.3</b>       | <b>(0.3-0.4)</b> | <b>100</b>          |

| Main chapters of ICD-10 related to survival<br>Age 31 -60 |                                                                                                     | Day 1 mortality |                  | Number<br>of deaths | Day 30 mortality |                  | Number of<br>deaths |
|-----------------------------------------------------------|-----------------------------------------------------------------------------------------------------|-----------------|------------------|---------------------|------------------|------------------|---------------------|
|                                                           |                                                                                                     | % (CI)          |                  | Day one             | % (CI)           |                  | Day 30              |
| I.                                                        | Certain infectious and parasitic diseases                                                           | 2.3             | (1.3-4.0)        | 11                  | 6.2              | (4.4-8.7)        | 30                  |
| II.                                                       | Neoplasms                                                                                           | 3.4             | (1.7-7.1)        | 7                   | 20.7             | (15.7-26.9)      | 42                  |
| III.                                                      | Diseases of the blood and blood-forming organs and certain disorders involving the immune mechanism | 0.0             |                  | 0                   | 3.7              | (1.4-9.5)        | 4                   |
| IV.                                                       | Endocrine, nutritional and metabolic diseases                                                       | 0.3             | (0.1-0.8)        | 3                   | 1.9              | (1.3-2.9)        | 22                  |
| V.                                                        | Mental and behavioural disorders                                                                    | 0.1             | (0.0-0.2)        | 3                   | 0.8              | (0.6-1.1)        | 29                  |
| VI.                                                       | Diseases of the nervous system                                                                      | 0.3             | (0.1-0.6)        | 6                   | 1.0              | (0.6-1.5)        | 21                  |
| VII.                                                      | Diseases of the eye and adnexa                                                                      | 0.0             |                  | 0                   | 0.0              |                  | 0                   |
| VIII.                                                     | Diseases of the ear and mastoid process                                                             | 0.0             |                  | 0                   | 0.0              |                  | 0                   |
| IX.                                                       | Diseases of the circulatory system                                                                  | 4.8             | (4.1-5.5)        | 177                 | 7.7              | (6.9-8.6)        | 285                 |
| X.                                                        | Diseases of the respiratory system                                                                  | 1.4             | (1.0-2.1)        | 30                  | 6.0              | (5.1-7.1)        | 125                 |
| XI.                                                       | Diseases of the digestive system                                                                    | 0.9             | (0.6-1.5)        | 16                  | 3.4              | (2.7-4.4)        | 61                  |
| XII.                                                      | Diseases of the skin and subcutaneous tissue                                                        | 0.0             |                  | 0                   | 0.0              |                  | 0                   |
| XIII.                                                     | Diseases of the musculoskeletal system and connective tissue                                        | 0.0             |                  | 0                   | 0.3              | (0.1-0.9)        | 3                   |
| XIV.                                                      | Diseases of the genitourinary system                                                                | 0.5             | (0.2-1.6)        | 3                   | 1.2              | (0.6-2.5)        | 7                   |
| XV.                                                       | Pregnancy, childbirth and the puerperium                                                            | 0.0             |                  | 0                   | 0.0              |                  | 0                   |
| XVI.                                                      | Certain conditions originating in the perinatal period                                              | 0.0             |                  | 0                   | 0.0              |                  | 0                   |
| XVII.                                                     | Congenital malformations, deformations and chromosomal abnormalities                                | 0.0             |                  | 0                   | 3.4              | (0.5-22.1)       | 1                   |
| XVIII.                                                    | Symptoms, signs and abnormal clinical and laboratory findings, not elsewhere classified             | 1.7             | (1.4-2.0)        | 134                 | 2.6              | (2.3-3.0)        | 209                 |
| XIX.                                                      | Injury, poisoning and certain other consequences of external causes                                 | 0.2             | (0.1-0.3)        | 28                  | 0.7              | (0.6-0.8)        | 102                 |
| XXI.                                                      | Factors influencing health status and contact with health services                                  | 0.1             | (0.1-0.3)        | 11                  | 0.5              | (0.3-0.6)        | 36                  |
|                                                           | Codes for special purposes                                                                          | 1.9             | (0.5-7.5)        | 2                   | 2.9              | (0.9-8.7)        | 3                   |
|                                                           | <b>Total</b>                                                                                        | <b>0.9</b>      | <b>(0.8-1.0)</b> | <b>431</b>          | <b>2.0</b>       | <b>(1.9-2.1)</b> | <b>983</b>          |

| Main chapters of ICD-10 related to survival<br>Age 61+ |                                                                                                     | Day 1 mortality |                  | Number<br>of deaths | Day 30 mortality |                  | Number of<br>deaths |
|--------------------------------------------------------|-----------------------------------------------------------------------------------------------------|-----------------|------------------|---------------------|------------------|------------------|---------------------|
|                                                        |                                                                                                     | % (CI)          |                  | Day one             | % (CI)           |                  | Day 30              |
| I.                                                     | Certain infectious and parasitic diseases                                                           | 5.5             | (4.3-6.9)        | 67                  | 16.0             | (14.1-18.2)      | 196                 |
| II.                                                    | Neoplasms                                                                                           | 5.4             | (3.8-7.6)        | 30                  | 36.0             | (32.2-40.2)      | 200                 |
| III.                                                   | Diseases of the blood and blood-forming organs and certain disorders involving the immune mechanism | 2.0             | (1.0-3.9)        | 8                   | 10.5             | (7.9-13.9)       | 43                  |
| IV.                                                    | Endocrine, nutritional and metabolic diseases                                                       | 1.2             | (0.8-1.8)        | 23                  | 7.0              | (5.9-8.3)        | 132                 |
| V.                                                     | Mental and behavioural disorders                                                                    | 0.2             | (0.0-0.6)        | 2                   | 2.7              | (2.0-3.8)        | 32                  |
| VI.                                                    | Diseases of the nervous system                                                                      | 0.4             | (0.2-0.9)        | 9                   | 3.0              | (2.3-3.8)        | 60                  |
| VII.                                                   | Diseases of the eye and adnexa                                                                      | 0.0             |                  | 0                   | 0.0              |                  | 0                   |
| VIII.                                                  | Diseases of the ear and mastoid process                                                             | 0.5             | (0.1-3.2)        | 1                   | 2.8              | (1.2-6.0)        | 6                   |
| IX.                                                    | Diseases of the circulatory system                                                                  | 8.6             | (8.1-9.1)        | 1,012               | 16.9             | (16.3-17.6)      | 2,000               |
| X.                                                     | Diseases of the respiratory system                                                                  | 3.7             | (3.3-4.1)        | 257                 | 14.5             | (13.7-15.3)      | 1,015               |
| XI.                                                    | Diseases of the digestive system                                                                    | 2.6             | (2.0-3.3)        | 67                  | 9.9              | (8.9-11.2)       | 258                 |
| XII.                                                   | Diseases of the skin and subcutaneous tissue                                                        | 0.0             |                  | 0                   | 5.4              | (2.3-12.6)       | 5                   |
| XIII.                                                  | Diseases of the musculoskeletal system and connective tissue                                        | 0.2             | (0.1-0.9)        | 2                   | 3.2              | (2.2-4.5)        | 29                  |
| XIV.                                                   | Diseases of the genitourinary system                                                                | 1.0             | (0.6-1.8)        | 14                  | 6.9              | (5.6-8.4)        | 92                  |
| XV.                                                    | Pregnancy, childbirth and the puerperium                                                            | NA              |                  |                     | NA               |                  |                     |
| XVI.                                                   | Certain conditions originating in the perinatal period                                              | 0.0             |                  | 0                   | 0.0              |                  | 0                   |
| XVII.                                                  | Congenital malformations, deformations and chromosomal abnormalities                                | 0.0             |                  | 0                   | 0.0              |                  | 0                   |
| XVIII.                                                 | Symptoms, signs and abnormal clinical and laboratory findings, not elsewhere classified             | 4.0             | (3.7-4.4)        | 462                 | 7.7              | (7.3-8.2)        | 883                 |
| XIX.                                                   | Injury, poisoning and certain other consequences of external causes                                 | 0.8             | (0.6-0.9)        | 107                 | 4.4              | (4.0-4.7)        | 617                 |
| XXI.                                                   | Factors influencing health status and contact with health services                                  | 0.8             | (0.7-1.1)        | 61                  | 3.2              | (2.8-3.6)        | 233                 |
|                                                        | Codes for special purposes                                                                          | 3.4             | (0.5-22.1)       | 1                   | 3.4              | (0.5-22.1)       | 2                   |
|                                                        | <b>Total</b>                                                                                        | <b>3.3</b>      | <b>(3.2-3.4)</b> | <b>2,123</b>        | <b>9.0</b>       | <b>(8.8-9.3)</b> | <b>5,804</b>        |
